# Supplementary material for: Autotoxicity of Endogenous Organic Acid Stress in Two Ganoderma lucidum Cultivars
Source: MDPI journal article supplement (doi:10.3390/molecules27196734), 2022-10-09
Supplement: s1 [file s1]

**Table S1** Organic acids and derivatives in germ substrates of two cultivars by positive MS<sup>E</sup> continuum

| No. | Differential compounds                                                                                              | Retention<br>time(min) | Formula       | Content<br>change |
|-----|---------------------------------------------------------------------------------------------------------------------|------------------------|---------------|-------------------|
| 1   | beta-Alanyl-L-arginine                                                                                              | 0.92                   | C9H19N5O3     | DOWN              |
| 2   | L-Citrulline                                                                                                        | 0.93                   | C6H13N3O3     | DOWN              |
| 3   | D-Gulonic acid                                                                                                      | 1.02                   | C6H12O7       | DOWN              |
| 4   | N-Acetylneuraminic acid                                                                                             | 1.04                   | C11H19NO9     | DOWN              |
| 5   | pantethine                                                                                                          | 1.05                   | C22H42N4O8S2  | DOWN              |
| 6   | 4-Methyleneglutamic acid                                                                                            | 1.08                   | C6H9NO4       | DOWN              |
| 7   | N-Heptanoylglycine                                                                                                  | 1.13                   | C9H17NO3      | UP                |
| 8   | N-Acetyl-4-O-acetylneuraminic acid                                                                                  | 1.13                   | C13H21NO10    | DOWN              |
| 9   | L-dopaquinone                                                                                                       | 1.14                   | C9H9NO4       | UP                |
| 10  | Isonicotinic acid                                                                                                   | 1.15                   | C6H5NO2       | UP                |
| 11  | (2S)-3-Methyl-2-({[(3S,4S,5R)-2,3,4-trihydroxy-5-(hydroxymethyl)tetrahydro-2-furanyl]methyl}a<br>mino)butanoic acid | 1.19                   | C11H21NO7     | DOWN              |
| 12  | N-Acetylmuramic acid                                                                                                | 1.25                   | C11H19NO8     | DOWN              |
| 13  | pantothenic acid                                                                                                    | 1.50                   | C9H17NO5      | UP                |
| 14  | 4-Guanidinobutanoic acid                                                                                            | 1.57                   | C5H11N3O2     | UP                |
| 15  | linatine                                                                                                            | 2.06                   | C10H17N3O5    | UP                |
| 16  | 2-Acetamidohexanedioic acid                                                                                         | 2.25                   | C8H13NO5      | UP                |
| 17  | Glutaryl glycine                                                                                                    | 2.36                   | C7H11NO5      | UP                |
| 18  | 3-Methylhippuric Acid                                                                                               | 2.49                   | C10H11NO3     | DOWN              |
| 19  | 5,5'-[Disulfanediy]bis({3-[(carboxymethyl)amino]-3-oxo-1,2-propanediyl} imino)]bis(2-amino-5-ox<br>opentanoic acid) | 2.50                   | C20H32N6O12S2 | DOWN              |

|    |                                                                                                            |      |             |      |
|----|------------------------------------------------------------------------------------------------------------|------|-------------|------|
| 20 | 4-Undecylbenzenesulfonic acid                                                                              | 2.52 | C17H28O3S   | DOWN |
| 21 | (E)-p-coumaric acid                                                                                        | 2.56 | C9H8O3      | DOWN |
| 22 | (2S)-6-Amino-2-[(E)-(hydroxymethylene)amino]hexanimidic acid                                               | 2.63 | C7H15N3O2   | UP   |
| 23 | 2-Amino-6-[(E)-(5-amino-5-carboxy-2-hydroxypentylidene)amino]-5-hydroxyhexanoic acid                       | 2.65 | C12H23N3O6  | DOWN |
| 24 | 3,3',3'',3''',3''''-[8,13-Bis(carboxymethyl)-18-methyl-2,3,7,12,17-porphyrinpentayl]pentapropanoic acid    | 2.74 | C40H40N4O14 | DOWN |
| 25 | 1,4'-Bipiperidine-1'-carboxylic acid                                                                       | 2.87 | C11H20N2O2  | DOWN |
| 26 | 1-{[(3S,4S,5R)-2,3,4-Trihydroxy-5-(hydroxymethyl)tetrahydro-2-furanyl]methyl}-2-pyrrolidinecarboxylic acid | 2.90 | C11H19NO7   | DOWN |
| 27 | Pipecolic acid                                                                                             | 2.94 | C6H11NO2    | UP   |
| 28 | (6S)-2-Amino-6-[(3-carboxypropanoyl)amino]heptanedioic acid                                                | 2.95 | C11H18N2O7  | UP   |
| 29 | (2E)-3-(6-Hydroxy-2,3,4-trimethoxyphenyl)acrylic acid                                                      | 2.98 | C12H14O6    | UP   |
| 30 | N6,N6,N6-Trimethyl-L-lysine                                                                                | 3.05 | C9H20N2O2   | DOWN |
| 31 | Prolylglycine                                                                                              | 3.09 | C7H12N2O3   | DOWN |
| 32 | (2E)-3-(7-Hydroxy-6-methoxy-1,3-benzodioxol-5-yl)acrylic acid                                              | 3.14 | C11H10O6    | UP   |
| 33 | 4-[(3-Acetamidopropyl)amino]butanoic acid                                                                  | 3.17 | C9H18N2O3   | DOWN |
| 34 | Methionyl-Proline                                                                                          | 3.18 | C10H18N2O3S | DOWN |
| 35 | (2E)-2-Hexenedioic acid                                                                                    | 3.19 | C6H8O4      | DOWN |
| 36 | Coprine                                                                                                    | 3.22 | C8H14N2O4   | UP   |
| 37 | 6-Acetamido-2-oxohexanoic acid                                                                             | 3.25 | C8H13NO4    | UP   |
| 38 | 2-Hydroxy-3-(3,4,5-trihydroxyphenyl)propanoic acid                                                         | 3.27 | C9H10O6     | UP   |
| 39 | 2-methoxy-17beta-estradiol 3-glucosiduronic acid                                                           | 3.29 | C25H34O9    | DOWN |
| 40 | L-Phenylalanine                                                                                            | 3.29 | C9H11NO2    | UP   |
| 41 | 2-methylcitric acid                                                                                        | 3.32 | C7H10O7     | UP   |
| 42 | Ascorbalamic acid                                                                                          | 3.34 | C9H13NO8    | DOWN |
| 43 | O-Acetyl-L-serine                                                                                          | 3.36 | C5H9NO4     | DOWN |

|    |                                                                                                                                   |      |              |      |
|----|-----------------------------------------------------------------------------------------------------------------------------------|------|--------------|------|
| 44 | (6alpha,8xi,11beta,14xi,16alpha,17alpha)-6,9-Difluoro-11,17-dihydroxy-16-methyl-3-oxoandrost-1,4-diene-17-carboxylic acid         | 3.38 | C21H26F2O5   | DOWN |
| 45 | (2S)-5-[(2R)-6-Hydroxy-2,7,8-trimethyl-3,4-dihydro-2H-chromen-2-yl]-2-methylpentanoic acid                                        | 3.43 | C18H26O4     | DOWN |
| 46 | L-alpha-Amino-1H-pyrrole-1-hexanoic acid                                                                                          | 3.48 | C10H16N2O2   | DOWN |
| 47 | Hydroxypropyl-Lysine                                                                                                              | 3.49 | C11H21N3O4   | DOWN |
| 48 | N-4-hydroxyphenylacetylglutamic acid                                                                                              | 3.49 | C13H15NO6    | UP   |
| 49 | L-2-succinylamino-6-oxoheptanedioic acid                                                                                          | 3.58 | C11H15NO8    | UP   |
| 50 | 4-Aminobenzoic acid                                                                                                               | 3.62 | C7H7NO2      | UP   |
| 51 | 3-{2-[(2E)-3,7-Dimethyl-2,6-octadien-1-yl]-3,4,5-trihydroxyphenyl}propanoic acid                                                  | 3.67 | C19H26O5     | DOWN |
| 52 | Triethyl citrate                                                                                                                  | 3.76 | C12H20O7     | UP   |
| 53 | 3-(4-Hydroxy-3,5-dimethoxyphenyl)-2-oxiranecarboxylic acid                                                                        | 3.80 | C11H12O6     | UP   |
| 54 | 2-Acetoxy-3-[3-(4-hydroxy-phenyl)-acryloyloxy]-succinic acid                                                                      | 3.84 | C15H14O9     | UP   |
| 56 | 1-O-[(2E)-3-(3,4-Dihydroxyphenyl)-2-propenoyl]-beta-D-glucopyranuronic acid                                                       | 3.84 | C15H16O10    | UP   |
| 57 | 5-hydroxy-2-oxo-4-ureido-2,5-dihydro-1H-imidazole-5-carboxylic acid                                                               | 3.88 | C5H6N4O5     | UP   |
| 58 | Glycylproline                                                                                                                     | 3.91 | C7H12N2O3    | DOWN |
| 59 | Glutamylphenylalanine                                                                                                             | 3.93 | C14H18N2O5   | DOWN |
| 60 | (4Z,7Z,10S,11E)-10-Hydroperoxy-12-{(1R,5S,6R)-6-[(2Z)-2-penten-1-yl]-2,3-dioxabicyclo[2.2.1]hept-5-yl}-4,7,11-dodecatrienoic acid | 3.96 | C22H32O6     | DOWN |
| 61 | 2-[(3Z)-4,8-Dimethyl-3,7-nonadien-1-yl]-8-hydroxy-3-methylene-6-chromanecarboxylic acid                                           | 3.97 | C22H28O4     | DOWN |
| 62 | Vanillic acid-4-O-glucuronide                                                                                                     | 4.01 | C15H18O9     | UP   |
| 63 | 3-Hydroxy-3-carboxymethyl-adipic acid                                                                                             | 4.07 | C8H12O7      | UP   |
| 64 | 3-[(1E)-3-Hydroxy-1-propen-1-yl]phenyl hexopyranosiduronic acid                                                                   | 4.12 | C15H18O8     | UP   |
| 65 | 4-Hydroxy-5-(3,4,5-trihydroxyphenyl)pentanoic acid                                                                                | 4.16 | C11H14O6     | UP   |
| 66 | (2E)-3-(3,5-Dihydroxy-4-methoxyphenyl)acrylic acid                                                                                | 4.17 | C10H10O5     | UP   |
| 67 | N-{[5-Amino-1-(5-O-phosphonopentofuranosyl)-1H-imidazol-4-yl]carbonyl}aspartic acid                                               | 4.17 | C13H19N4O12P | UP   |
| 68 | Fertaric acid                                                                                                                     | 4.19 | C14H14O9     | UP   |

|    |                                                                                                  |      |            |      |
|----|--------------------------------------------------------------------------------------------------|------|------------|------|
| 69 | 4-(2-Aminophenyl)-2,4-dioxobutanoic acid                                                         | 4.30 | C10H9NO4   | UP   |
| 70 | 4-hydroxy-4-(indol-3-ylmethyl)glutamic acid                                                      | 4.31 | C14H16N2O5 | UP   |
| 71 | piscidic acid                                                                                    | 4.35 | C11H12O7   | UP   |
| 72 | 4-Hydroxy-3-nitrophenylacetic acid                                                               | 4.37 | C8H7NO5    | UP   |
| 73 | (4-Methoxy-1-benzofuran-5-yl)(oxo)acetic acid                                                    | 4.42 | C11H8O5    | UP   |
| 74 | {[(2E)-3-(3,4-Dihydroxyphenyl)-2-propenoyl]oxy}malonic acid                                      | 4.43 | C12H10O8   | UP   |
| 75 | 3-(2,4-Dihydroxyphenyl)-2-oxopropanoic acid                                                      | 4.45 | C9H8O5     | UP   |
| 76 | 2-(2-Carboxyethyl)-5-hydroxyphenyl hexopyranosiduronic acid                                      | 4.47 | C15H18O10  | UP   |
| 77 | 3,4,5-Trimethoxycinnamic acid                                                                    | 4.52 | C12H14O5   | UP   |
| 78 | DL-gamma-carboxyglutamic acid                                                                    | 4.59 | C6H9NO6    | UP   |
| 79 | 4-[(E)-2-Carboxyvinyl]-2-methoxyphenyl beta-D-glucopyranosiduronic acid                          | 4.61 | C16H18O10  | UP   |
| 80 | 3,4-Dihydroxy-5-[(2E,6Z)-3,7,11-trimethyl-2,6,10-dodecatrien-1-yl]benzoic acid                   | 4.68 | C22H30O4   | DOWN |
| 81 | 2-(3,4-dihydroxybenzoyloxy)-4,6-dihydroxybenzoic acid                                            | 4.79 | C14H10O8   | UP   |
| 82 | 1-O-[(6-Hydroxy-1,3-benzodioxol-5-yl)carbonyl]hexopyranuronic acid                               | 4.86 | C14H14O11  | UP   |
| 83 | 11-{3,4-Dimethyl-5-[(1E)-1-penten-1-yl]-2-furyl}undecanoic acid                                  | 4.91 | C22H36O3   | DOWN |
| 84 | 3,3'-(2,2'-Dihydroxy-4,4'-biphenyldiyl)bis(2-aminopropanoic acid)                                | 4.94 | C18H20N2O6 | DOWN |
| 85 | 8-(2-Hydroxy-3-methyl-3-buten-1-yl)-2-oxo-2H-chromen-7-yl hexopyranosiduronic acid               | 5.04 | C20H22O10  | UP   |
| 86 | Homocarnosine                                                                                    | 5.05 | C10H16N4O3 | UP   |
| 87 | (3E)-4-(1-Oxo-1H-isochromen-3-yl)-3-buten-1-yl hexopyranosiduronic acid                          | 5.17 | C19H20O9   | UP   |
| 88 | 3-(3,4-Dihydroxyphenyl)-2- {[ (2E)-3-(4-hydroxy-3-methoxyphenyl)-2-propenoyl]oxy} propanoic acid | 5.19 | C19H18O8   | UP   |
| 89 | (5E)-2,10-Diamino-5- {[ (5-amino-5-carboxypentyl)amino]methyl}-5-undecenedioic acid              | 5.24 | C18H34N4O6 | DOWN |
| 90 | 3-Hydroxy-2-(3-methyl-2-buten-1-yl)phenyl hexopyranosiduronic acid                               | 5.25 | C17H22O8   | UP   |
| 91 | 3-Hydroxyicosanoic acid                                                                          | 5.30 | C20H40O3   | DOWN |
| 92 | (-)-Cryptochlorogenic acid                                                                       | 5.33 | C16H18O9   | UP   |
| 93 | 3-Hydroxy-5, 8-tetradecadiencarnitine                                                            | 5.39 | C21H37NO5  | UP   |

|     |                                                                                                           |      |             |      |
|-----|-----------------------------------------------------------------------------------------------------------|------|-------------|------|
| 94  | Salvianolic acid D                                                                                        | 5.41 | C20H18O10   | UP   |
| 95  | 3,5-Dihydroxy-2-[3-(4-hydroxyphenyl)propanoyl]phenyl beta-D-glucopyranosiduronic acid                     | 5.41 | C21H22O11   | UP   |
| 96  | 3,4-Dihydroxy-2-(3-methyl-2-buten-1-yl)phenyl hexopyranosiduronic acid                                    | 5.54 | C17H22O9    | UP   |
| 97  | 1-O-[(2E)-3-(3-Hydroxy-4-methoxyphenyl)-2-propenoyl]-beta-D-glucopyranuronic acid                         | 5.58 | C16H18O10   | UP   |
| 98  | 6-Hydroxy-7-oxo-3a,12c-dihydro-7H-furo[3',2':4,5]furo[2,3-c]xanthen-8-yl hexopyranosiduronic acid         | 5.59 | C23H18O12   | UP   |
| 99  | 4-Oxo-1-(5,6,7-trimethoxy-4-oxo-4H-chromen-2-yl)-2,5-cyclohexadien-1-yl hexopyranosiduronic acid          | 5.60 | C24H24O13   | UP   |
| 100 | 5,7-Dihydroxy-4-oxo-2-phenyl-3,4-dihydro-2H-chromen-6-yl hexopyranosiduronic acid                         | 5.67 | C21H20O11   | UP   |
| 101 | 17-Hydroxylinolenic acid                                                                                  | 5.69 | C18H30O3    | UP   |
| 102 | 3-C-Carboxy-2-deoxy-4-O-[(2E)-3-(4-hydroxyphenyl)-2-propenoyl]pentaric acid                               | 5.76 | C15H14O10   | UP   |
| 103 | 3-[(1E)-4-Hydroxy-1-buten-1-yl]-1-oxo-1H-isochromen-5-yl hexopyranosiduronic acid                         | 5.78 | C19H20O10   | UP   |
| 104 | 2-Amino-3-[[({2-carboxy-2-[(Z)-(1-hydroxyethylidene)amino]ethyl} sulfanyl)methyl}sulfanyl]propanoic acid  | 5.79 | C9H16N2O5S2 | UP   |
| 105 | 6-Hydroxy-7-oxo-1,2,3a,12c-tetrahydro-7H-furo[3',2':4,5]furo[2,3-c]xanthen-8-yl hexopyranosiduronic acid  | 5.81 | C23H20O12   | UP   |
| 106 | 2-Benzyl-2,4,6-trihydroxy-3-oxo-2,3-dihydro-1-benzofuran-5-yl hexopyranosiduronic acid                    | 5.82 | C21H20O12   | UP   |
| 107 | 4-[(2R)-2-(Aminomethyl)-2-(hydroxymethyl)-5-oxo-1-pyrrolidinyl]-3-(3-pentanylamino)benzoic acid           | 5.85 | C18H27N3O4  | DOWN |
| 108 | Traumatic Acid                                                                                            | 5.85 | C12H20O4    | DOWN |
| 109 | 2-Methoxy-5-[(2R,3R)-3,5,7-trihydroxy-3,4-dihydro-2H-chromen-2-yl]phenyl beta-D-glucopyranosiduronic acid | 5.87 | C22H24O12   | UP   |
| 110 | 2-Hydroxy-3-[4-hydroxy-3-methoxy-5-(3-methyl-2-buten-1-yl)phenyl]propanoic acid                           | 5.89 | C15H20O5    | UP   |
| 111 | 5-Hydroxydecanedioic acid                                                                                 | 5.91 | C10H18O5    | DOWN |
| 112 | 5-Formiminotetrahydrofolic acid                                                                           | 6.11 | C20H24N8O6  | UP   |
| 113 | 2-(Phenoxycarbonyl)phenyl hexopyranosiduronic acid                                                        | 6.13 | C19H18O9    | UP   |

|     |                                                                                                                                       |      |              |      |
|-----|---------------------------------------------------------------------------------------------------------------------------------------|------|--------------|------|
| 114 | (2E)-3-(3-Hydroxy-2,4-dimethoxyphenyl)acrylic acid                                                                                    | 6.14 | C11H12O5     | UP   |
| 115 | 3-[(1E)-1-Buten-1-yl]-1-oxo-1H-isochromen-5-yl hexopyranosiduronic acid                                                               | 6.16 | C19H20O9     | UP   |
| 116 | (6S)-2,6-Anhydro-6-[(1S)-2-isopropyl-5-methylcyclohexyl]-L-gulonic acid                                                               | 6.24 | C16H28O6     | UP   |
| 117 | 7-[(1R,5S)-6-Amino-3-azabicyclo[3.1.0]hex-3-yl]-1-(2,4-difluorophenyl)-6-fluoro-4-oxo-1,4-dihydro-1,8-naphthyridine-3-carboxylic acid | 6.28 | C20H15F3N4O3 | UP   |
| 118 | 2-Amino-6-({[2,3,4-trihydroxy-5-(hydroxymethyl)tetrahydro-2-furanyl]methyl} amino)hexanoic acid                                       | 6.29 | C12H24N2O7   | UP   |
| 119 | 3,6,7-Trihydroxy-2-(4-hydroxy-3-methoxyphenyl)-8aH-chromen-5-yl hexopyranosiduronic acid                                              | 6.33 | C22H22O13    | UP   |
| 120 | 6-Hydroxypentadecanedioic acid                                                                                                        | 6.35 | C15H28O5     | UP   |
| 121 | 1-(2-Carboxyethyl)-2,3,4,9-tetrahydro-1H-beta-carboline-3-carboxylic acid                                                             | 6.37 | C15H16N2O4   | UP   |
| 122 | 5-Hydroxy-2-(3-hydroxy-4-methoxyphenyl)-4-oxo-3,4-dihydro-2H-chromen-7-yl beta-D-glucopyranosiduronic acid                            | 6.51 | C22H22O12    | UP   |
| 123 | 4-(5-Hydroxy-2-methyl-2-azabicyclo[2.2.2]oct-5-yl)-3-methylbutanoic acid                                                              | 6.52 | C13H23NO3    | DOWN |
| 124 | 7-Hydroxy-1,4a-dimethyl-8-methylenegibbane-1,10-dicarboxylic acid                                                                     | 6.54 | C20H28O5     | DOWN |
| 125 | Myristoylglycine                                                                                                                      | 6.57 | C16H31NO3    | DOWN |
| 126 | 7-Hydroxyhexadecanedioic acid                                                                                                         | 6.57 | C16H30O5     | UP   |
| 127 | 4-(5,7-Dihydroxy-3,6-dimethoxy-4-oxo-4H-chromen-2-yl)-2-methoxyphenyl beta-D-glucopyranosiduronic acid                                | 6.59 | C24H24O14    | UP   |
| 128 | 5-Hydroxy-4-(6-hydroxy-3-oxo-2,3-dihydro-1-benzofuran-2-yl)-3-methoxy-2-(3-methyl-2-buten-1-yl)phenyl hexopyranosiduronic acid        | 6.64 | C26H28O12    | UP   |
| 129 | 4a-Formyl-3,7-dihydroxy-1-methyl-8-methylenegibbane-1,10-dicarboxylic acid                                                            | 6.71 | C20H26O7     | UP   |
| 130 | 3,7,15-Trihydroxy-11,23-dioxolanost-8-en-26-oic acid                                                                                  | 6.80 | C30H46O7     | UP   |
| 131 | 7-(3-Methyl-5-propyl-2-furyl)heptanoic acid                                                                                           | 6.82 | C15H24O3     | DOWN |
| 132 | (9alpha,11alpha,13E,15S)-5,6,9,11,15-Pentahydroxyprost-13-en-1-oic acid                                                               | 6.86 | C20H36O7     | UP   |
| 133 | (24E)-3,7,12,23-Tetrahydroxy-11,15-dioxolanosta-8,24-dien-26-oic acid                                                                 | 6.90 | C30H44O8     | UP   |
| 134 | 4-(5,6-Dihydroxy-3-oxo-2,3-dihydro-1-benzofuran-2-yl)-5-hydroxy-3-methoxy-2-(3-methyl-2-bute                                          | 6.95 | C26H28O13    | UP   |

|     |                                                                                                                                                               |      |            |      |
|-----|---------------------------------------------------------------------------------------------------------------------------------------------------------------|------|------------|------|
|     | n-1-yl)phenyl hexopyranosiduronic acid                                                                                                                        |      |            |      |
| 135 | 4-(5,7-Dihydroxy-4-oxo-3,4-dihydro-2H-chromen-2-yl)phenyl beta-D-erythro-hexopyranosiduronic acid                                                             | 6.95 | C21H20O11  | UP   |
| 136 | 2-(6-Carboxy-5-{3-[3-(2,4-dihydroxyphenyl)propanoyl]-2,6-dihydroxyphenyl}-3-methyl-3-cyclohexen-1-yl)-5-hydroxyphenyl hexopyranosiduronic acid                | 6.96 | C35H36O15  | DOWN |
| 137 | 4a-Formyl-7,9-dihydroxy-1-methyl-8-methylenegibbane-1,10-dicarboxylic acid                                                                                    | 7.01 | C20H26O7   | UP   |
| 138 | 3,5-Dihydroxy-4-(3-methyl-2-buten-1-yl)-2-[3-(2,4,5-trihydroxyphenyl)propanoyl]phenyl hexopyranosiduronic acid                                                | 7.10 | C26H30O13  | UP   |
| 139 | Hexadecanedioic acid mono-L-carnitine ester                                                                                                                   | 7.10 | C23H43NO6  | DOWN |
| 140 | 7,7'-Dihydroxy-5'-methoxy-2',2'-dimethyl-4-oxo-3',4'-dihydro-2'H,4H-3,6'-bichromen-5-yl hexopyranosiduronic acid                                              | 7.12 | C27H28O13  | UP   |
| 141 | 4-[2-(2,4-Dihydroxyphenyl)-2-oxoethyl]-5-hydroxy-2-[(2E)-4-hydroxy-3-methyl-2-buten-1-yl]-3-methoxyphenyl hexopyranosiduronic acid                            | 7.25 | C26H30O13  | UP   |
| 142 | 1-O-[(2S)-2-(6-Methoxy-2-naphthyl)propanoyl]-D-glucopyranuronic acid                                                                                          | 7.30 | C20H22O9   | UP   |
| 143 | 2-Deoxy-4-O-[(2E)-3-(4-hydroxyphenyl)-2-propenoyl]pentaric acid                                                                                               | 7.31 | C14H14O8   | UP   |
| 144 | 2-(3-Hydroxybenzyl)succinic acid                                                                                                                              | 7.32 | C11H12O5   | UP   |
| 145 | (2R)-1-[(2S,4R,5Z)-4-Benzyl-2,5-dihydroxy-5-{[(1R,2S)-2-hydroxy-2,3-dihydro-1H-inden-1-yl]imino}pentyl]-N-(2-methyl-2-propenyl)-2-piperazinecarboximidic acid | 7.37 | C30H42N4O4 | UP   |
| 146 | 2,6-Anhydro-6-[1-(1,3-benzodioxol-5-yl)-3-(4-methoxy-1-benzofuran-5-yl)-1,3-dioxo-2-propenyl]hexonic acid                                                     | 7.41 | C25H22O12  | UP   |
| 147 | 8,10-Dihydroxy-11-(3-methyl-2-buten-1-yl)-6-(2-methyl-1-propen-1-yl)-7-oxo-6H,7H-chromeno[4,3-b]chromen-3-yl hexopyranosiduronic acid                         | 7.45 | C31H32O12  | DOWN |
| 148 | Mevalonic acid-5P                                                                                                                                             | 7.49 | C6H13O7P   | UP   |
| 149 | 2-[2-(2,4-Dihydroxyphenyl)-2-oxoethyl]-5-hydroxy-3-methoxy-4-(3-methyl-2-buten-1-yl)phenyl hexopyranosiduronic acid                                           | 7.58 | C26H30O12  | UP   |
| 150 | 2,6-Anhydro-6-[1-(3,4-dihydroxyphenyl)-3-(4-methoxy-1-benzofuran-5-yl)-1,3-dioxo-2-propenyl]                                                                  | 7.71 | C24H22O12  | UP   |

|     |                                                                                                                                                                                                        |       |           |      |
|-----|--------------------------------------------------------------------------------------------------------------------------------------------------------------------------------------------------------|-------|-----------|------|
|     | hexonic acid                                                                                                                                                                                           |       |           |      |
| 151 | 5-Hydroxy-2,2-dimethyl-6-oxo-8-phenyl-1a,9c-dihydro-2H,6H-oxireno[c]pyrano[2,3-f]chromen-7-yl hexopyranosiduronic acid                                                                                 | 7.76  | C26H24O12 | UP   |
| 152 | 2-[(2E)-3,7-Dimethyl-2,6-octadien-1-yl]-3,4,6-trihydroxybenzoic acid                                                                                                                                   | 7.78  | C17H22O5  | UP   |
| 153 | Elaidolinolenic acid                                                                                                                                                                                   | 7.87  | C18H30O2  | DOWN |
| 154 | (2E,6E,10E)-13-[(2R)-6-Hydroxy-2,7,8-trimethyl-3,4-dihydro-2H-chromen-2-yl]-2,6,10-trimethyl-2,6,10-tridecatrienoic acid                                                                               | 7.90  | C28H40O4  | UP   |
| 155 | (8xi,9xi,14beta,17xi)-7-Hydroxy-3-oxocholan-24-oic acid                                                                                                                                                | 7.99  | C24H38O4  | UP   |
| 156 | 3-Hydroxy-5-({2-hydroxy-5-oxo-6-[(5,5,8a-trimethyl-2-methylenedecahydro-1-naphthalenyl)methyl]-7-oxabicyclo[4.1.0]hept-3-en-3-yl} methoxy)-3-methyl-5-oxopentanoic acid                                | 8.14  | C28H40O8  | UP   |
| 157 | 3-Hydroxytetradecanedioic acid                                                                                                                                                                         | 8.53  | C14H26O5  | UP   |
| 158 | b-D-Glucopyranosiduronic acid, (3a,5b)-24-[(carboxymethyl)amino]-24-oxocholan-3-yl                                                                                                                     | 8.73  | C26H43NO4 | DOWN |
| 159 | 2-Hydroxytetracosanoic acid                                                                                                                                                                            | 8.76  | C24H48O3  | UP   |
| 160 | 8-oxo-9,11-octadecadiynoic acid                                                                                                                                                                        | 8.95  | C18H26O3  | DOWN |
| 161 | (6E,8S,10Z)-8-Hydroxy-3-oxo-6,10-hexadecadienoic acid                                                                                                                                                  | 8.97  | C16H26O4  | DOWN |
| 162 | [(2R,2'R,3R,4'R,4a'S,5S,5'R,6'R,8a'R)-5-(3-Furyl)-2,4'-dihydroxy-2',4a',5',8a'-tetrakis(hydroxymethyl)-6'-{[(2E)-2-methyl-2-butenoyl]oxy} decahydro-2'H-spiro[furan-3,1'-naphthalen]-5'-yl]acetic acid | 9.01  | C28H40O12 | UP   |
| 163 | (10E,12E,14E)-9-Hydroxy-16-oxo-10,12,14-octadecatrienoic acid                                                                                                                                          | 9.07  | C18H28O4  | DOWN |
| 164 | 1,3,16,20,24-Pentahydroxy-24-(hydroxymethyl)-9,19-cyclolanostan-28-oic acid                                                                                                                            | 9.10  | C31H52O8  | DOWN |
| 165 | 16-Acetoxy-17-methoxy-17-oxokauran-18-oic acid                                                                                                                                                         | 9.17  | C23H34O6  | DOWN |
| 166 | 3,7,15-Trihydroxy-11,23-dioxolanost-8-en-26-oic acid                                                                                                                                                   | 9.48  | C30H46O7  | UP   |
| 167 | Prostan-1-oic acid, 9,11,15-trihydroxy-, (9a,11a,15S)-                                                                                                                                                 | 9.49  | C20H38O5  | DOWN |
| 168 | Capsiamide                                                                                                                                                                                             | 9.61  | C17H35NO  | DOWN |
| 169 | 3-Hydroxyhexadecadienoylcarnitine                                                                                                                                                                      | 9.68  | C23H41NO5 | DOWN |
| 170 | 9-Hexadecenoylcarnitine                                                                                                                                                                                | 10.18 | C23H43NO4 | DOWN |
| 171 | Phloionolic acid                                                                                                                                                                                       | 10.21 | C18H36O5  | DOWN |



|     |                                                                                                                         |       |           |      |
|-----|-------------------------------------------------------------------------------------------------------------------------|-------|-----------|------|
| 172 | 13-Hydroxy-9-methoxy-10-oxo-11-octadecenoic acid                                                                        | 10.45 | C19H34O5  | DOWN |
| 173 | (1Z,2Z)-N-(2-Hydroxy-2-{4-[(3-methyl-2-buten-1-yl)oxy]phenyl}ethyl)-3-phenyl-2-propenimidic acid                        | 10.51 | C22H25NO3 | DOWN |
| 174 | (3beta,5xi,9xi)-3-Hydroxyoleana-11,13(18)-dien-30-oic acid                                                              | 10.51 | C30H46O3  | UP   |
| 175 | 2-Hydroxy-8-(2-octyl-1-cyclopropen-1-yl)octanoic acid                                                                   | 10.54 | C19H34O3  | DOWN |
| 176 | 3,7,15-Trihydroxy-11,23-dioxolanost-8-en-26-oic acid                                                                    | 10.61 | C30H46O7  | UP   |
| 177 | Gamma-Linolenic acid                                                                                                    | 10.67 | C18H30O2  | DOWN |
| 178 | 3,15-Dihydroxy-11,23-dioxolanost-8-en-26-oic acid                                                                       | 10.72 | C30H46O6  | UP   |
| 179 | 13-oxotrideca-9,11-dienoic acid                                                                                         | 10.98 | C13H20O3  | DOWN |
| 180 | 2,3-Dihydroxy-29-methoxy-29-oxoolean-12-en-28-oic acid                                                                  | 11.63 | C31H48O6  | UP   |
| 181 | 16-Hydroxy-10-oxohexadecanoic acid                                                                                      | 11.70 | C16H30O4  | DOWN |
| 182 | 2-Hydroxy-10-isopropenyl-3,3,5a,5b,12b-pentamethyloctadecahydrodicyclopenta[a,i]phenanthrene-1,7a(1H)-dicarboxylic acid | 12.21 | C30H46O5  | UP   |
| 183 | 3-Acetoxy-24-hydroxylanosta-8,25-dien-21-oic acid                                                                       | 12.96 | C32H50O5  | DOWN |
| 184 | 3-{[(2E)-3-(3,4-Dihydroxyphenyl)-2-propenoyl]oxy}-2-hydroxylup-20(29)-en-28-oic acid                                    | 13.08 | C39H54O7  | DOWN |
| 185 | 5-Oxoctadecanoic acid                                                                                                   | 13.34 | C18H34O3  | DOWN |
| 186 | 3-Hydroxy-2-{[(2E)-3-(4-hydroxy-3-methoxyphenyl)-2-propenoyl]oxy}urs-12-en-28-oic acid                                  | 13.39 | C40H56O7  | DOWN |
| 187 | 16-Hydroxy-3-oxooleana-1,12-dien-28-oic acid                                                                            | 13.55 | C30H44O4  | UP   |
| 188 | (6R,10S)-13-[(2R)-6-Hydroxy-2,7,8-trimethyl-3,4-dihydro-2H-chromen-2-yl]-2,6,10-trimethyltridecanoic acid               | 13.65 | C28H46O4  | UP   |
| 189 | 11,12,13-Trinor-1,3,5-bisabolatrien-10-oic acid                                                                         | 13.66 | C12H16O2  | DOWN |
| 190 | Nisinic acid                                                                                                            | 13.72 | C24H36O2  | DOWN |
| 191 | (24E)-3-Acetoxy-15,22-dihydroxylanosta-7,9(11),24-trien-26-oic acid                                                     | 13.82 | C32H48O6  | UP   |
| 192 | 3-Acetoxy-24-hydroxy-15,22-dihydroxy-11,23-dioxolanost-8-en-26-oic acid                                                 | 13.95 | C32H50O4  | DOWN |
| 193 | 2-[(8E,11E,14Z)-8,11,14-Heptadecatrien-1-yl]-6-hydroxybenzoic acid                                                      | 15.27 | C24H34O3  | DOWN |
| 194 | (6E,8E,12E,14Z)-hexadeca-6,8,12,14-tetraen-10-ynoic acid                                                                | 15.97 | C16H20O2  | UP   |

**Table S2** Organic acids and derivatives in germ substrates of two cultivars by negative MS<sup>E</sup> continuum

| No. | Differential compounds                                                                                | Formula   | Retention | Content |
|-----|-------------------------------------------------------------------------------------------------------|-----------|-----------|---------|
|     |                                                                                                       |           | time(min) | change  |
| 1   | 5-(Hydroxymethyl)furoic acid                                                                          | C6H6O4    | 2.33      | UP      |
| 2   | 1,3,4-Trihydroxy-5- {[ (2Z)-3-(4-hydroxy-3-methoxyphenyl)-2-propenoyl]oxy} cyclohexanecarboxylic acid | C17H20O9  | 2.94      | UP      |
| 3   | 2-Deoxy-4-O-[(2E)-3-(4-hydroxyphenyl)-2-propenoyl]pentaric acid                                       | C14H14O8  | 3.84      | UP      |
| 4   | 3-C-Carboxy-2-deoxy-4-O-[(2E)-3-(4-hydroxyphenyl)-2-propenoyl]pentaric acid                           | C15H14O10 | 4.25      | UP      |
| 5   | 2-(2-Carboxyethyl)-5-hydroxyphenyl hexopyranosiduronic acid                                           | C15H18O10 | 4.45      | UP      |
| 6   | 3-[(1-Carboxyvinyl)oxy]-4-hydroxybenzoic acid                                                         | C10H8O6   | 4.75      | UP      |
| 7   | 5-hydroxy-2-oxo-4-ureido-2,5-dihydro-1 <i>H</i> -imidazole-5-carboxylic acid                          | C5H6N4O5  | 5.29      | UP      |
| 8   | 3,5-Dihydroxy-2-[3-(4-hydroxyphenyl)propanoyl]phenyl hexopyranosiduronic acid                         | C21H22O11 | 5.42      | UP      |
| 9   | {[(2E)-3-(3,4-Dihydroxyphenyl)-2-propenoyl]oxy}malonic acid                                           | C12H10O8  | 5.87      | UP      |
| 10  | C19:1 (CIS-10) ACID                                                                                   | C19H36O2  | 7.99      | DOWN    |

**a**

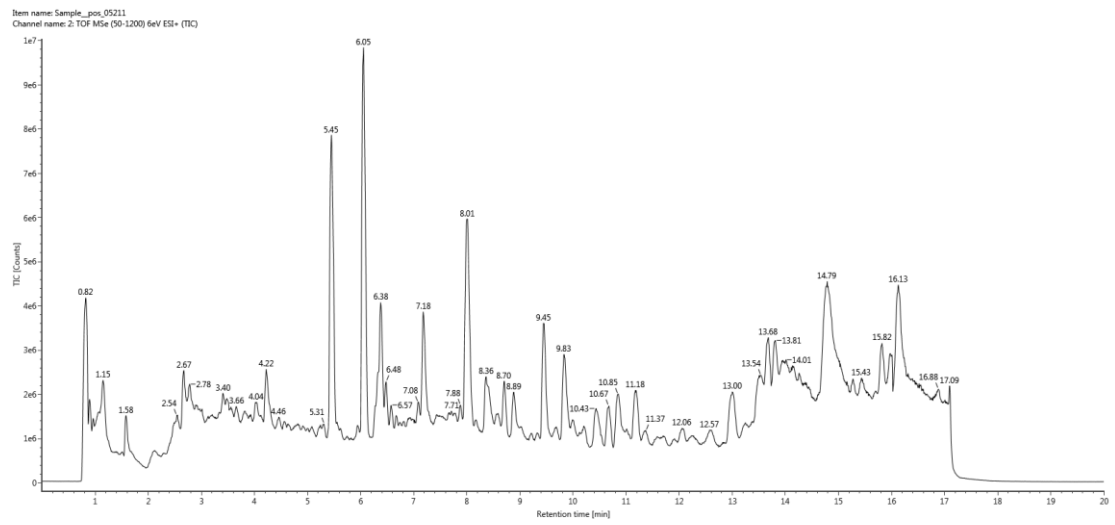

**b**

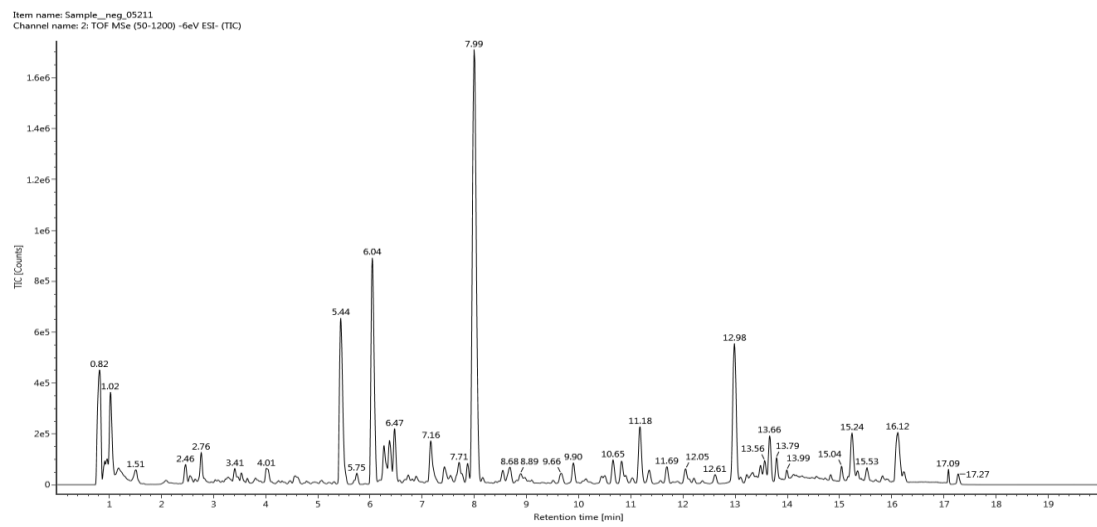

**c**

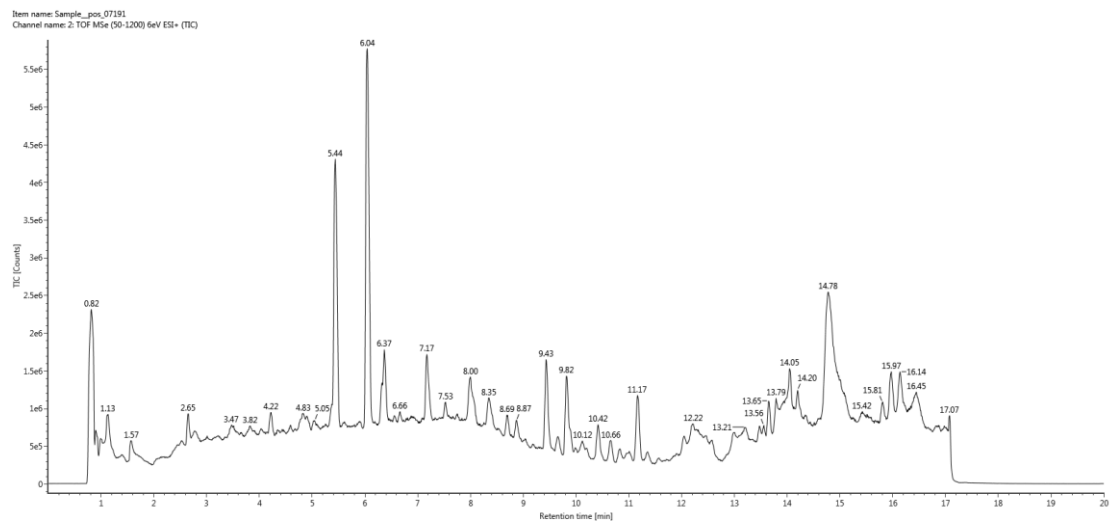

**d**

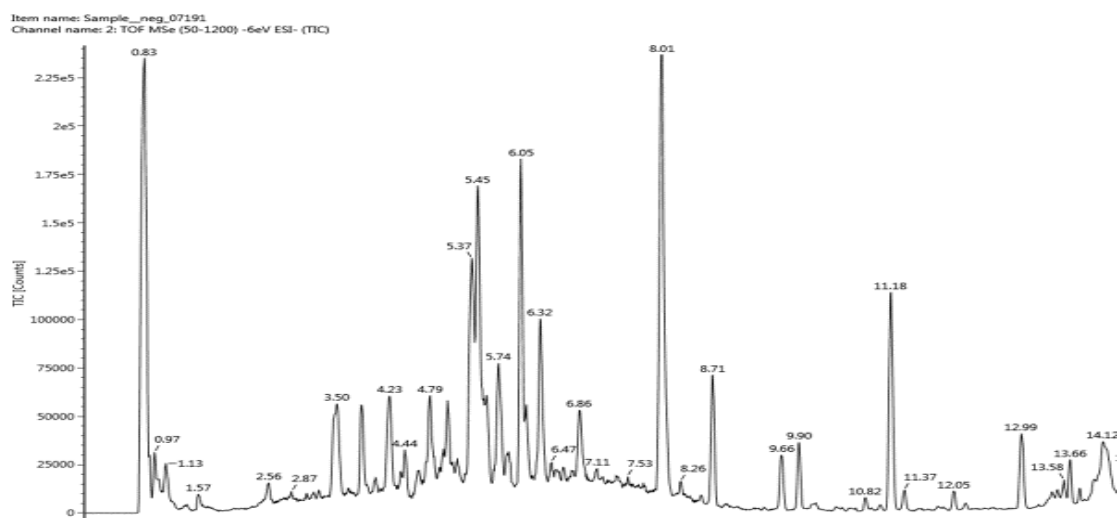

e

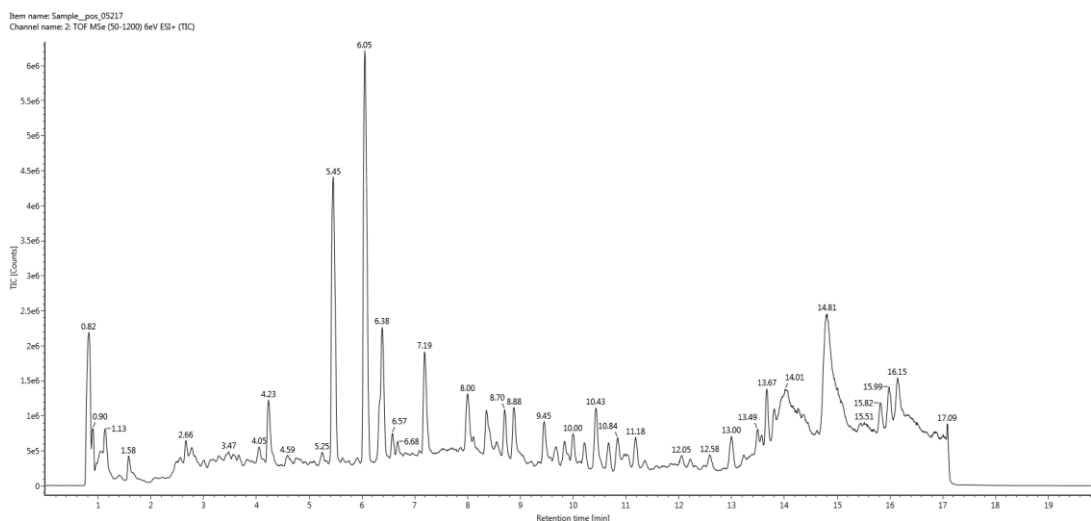

f

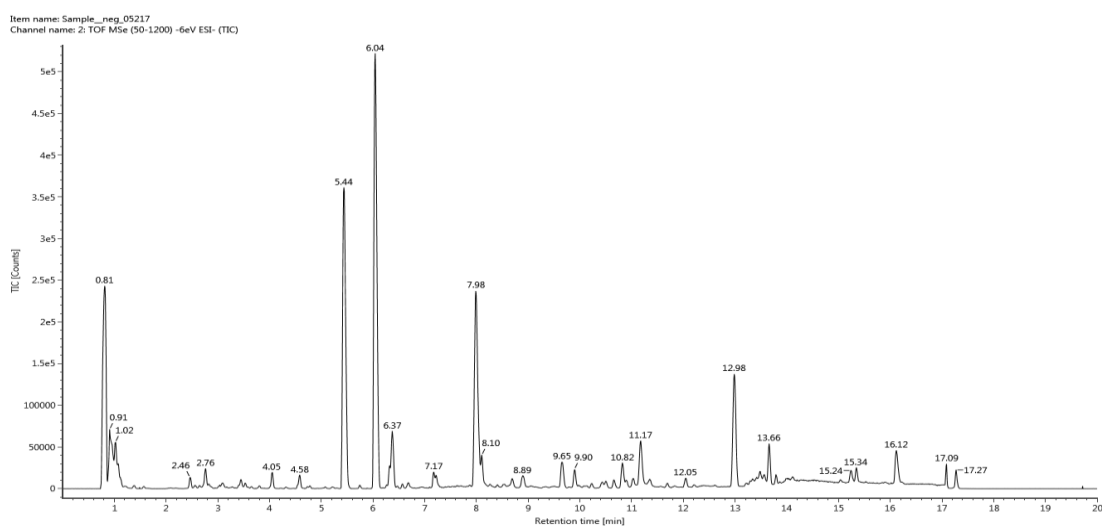

g

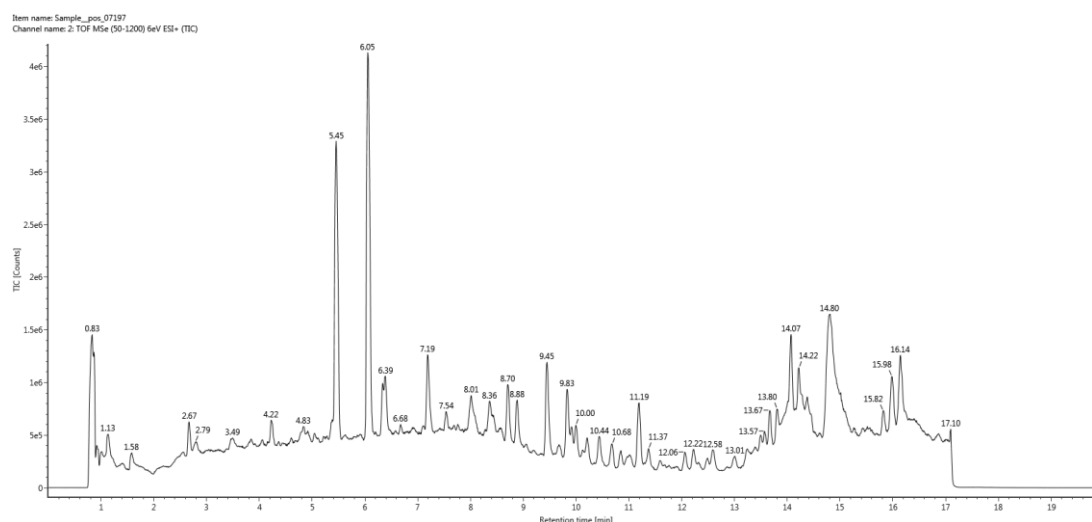

h

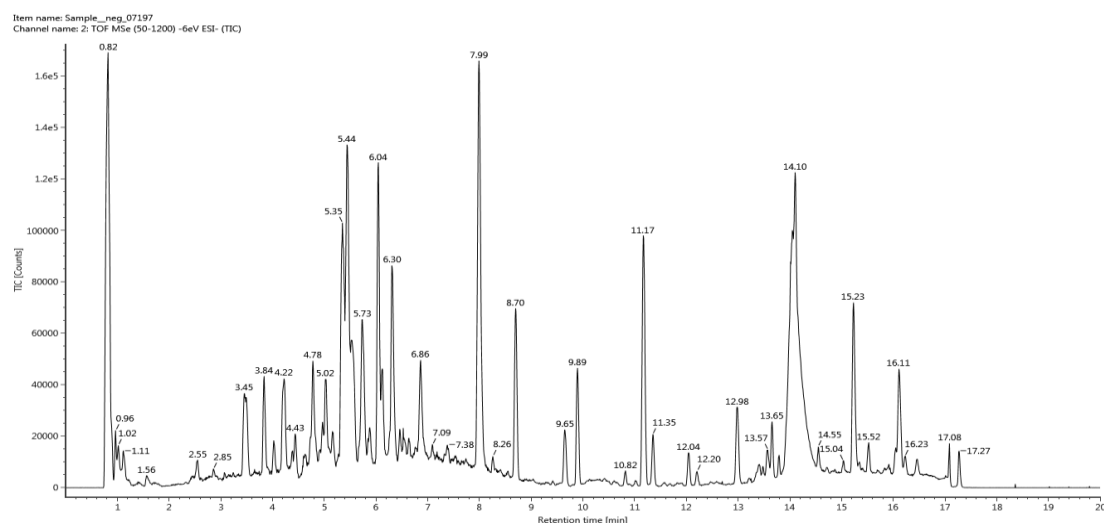

**Figure S1** Total ion chromatogram (TIC) of germ substrate sample of *G. lucidum* by LC-QTOF-MS in positive ion mode and negative ion mode. a and c are TICs of L09-1 germ substrate at the beginning and the end of whole cultivation in positive ion mode; b and d are TICs of L09-1 germ substrate at the beginning and the end of whole cultivation in negative ion mode; e and g are TICs of L09-2 germ substrate at the beginning and the end of whole cultivation in positive ion mode; f and h are TICs of L09-2 germ substrate at the beginning and the end of whole cultivation in negative ion mode.

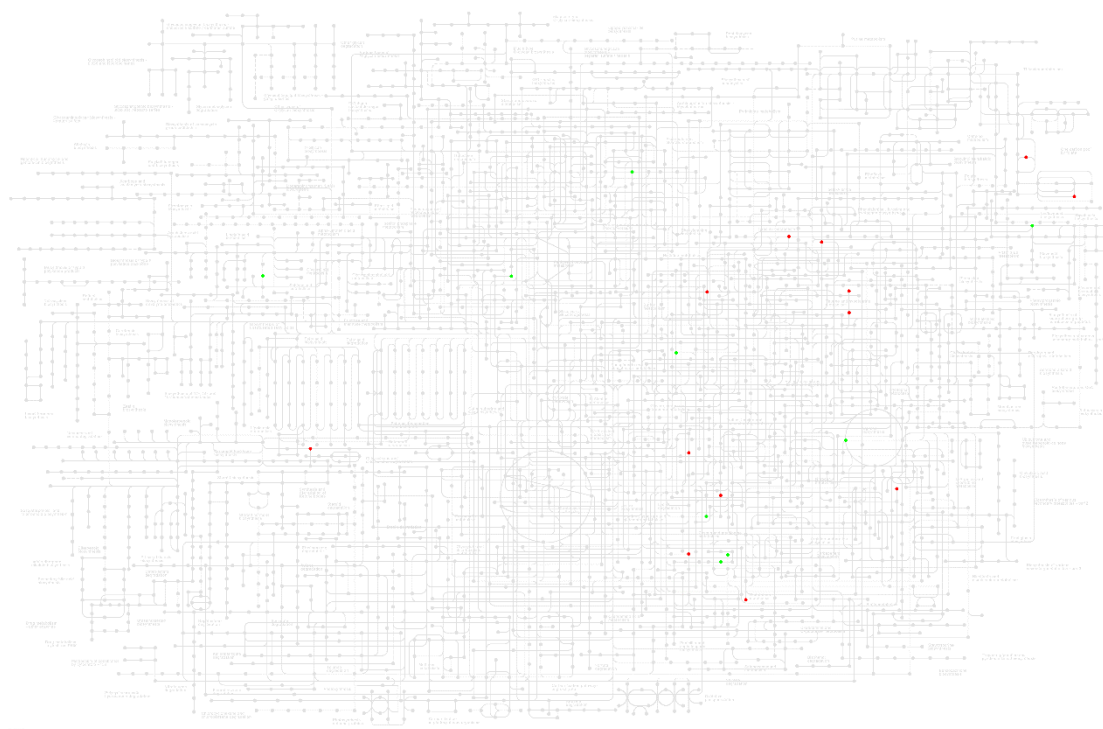

**Figure S2** Metabolic pathway is the main pathway in two *G. lucidum* by KEGG pathway enrichment analysis. There were 22 acid compounds involved in positive ion mode and one acid in negative ion mode. The red points in metabolic pathways indicate that the acids were upregulated, and the green points perform the downregulated compounds.

a

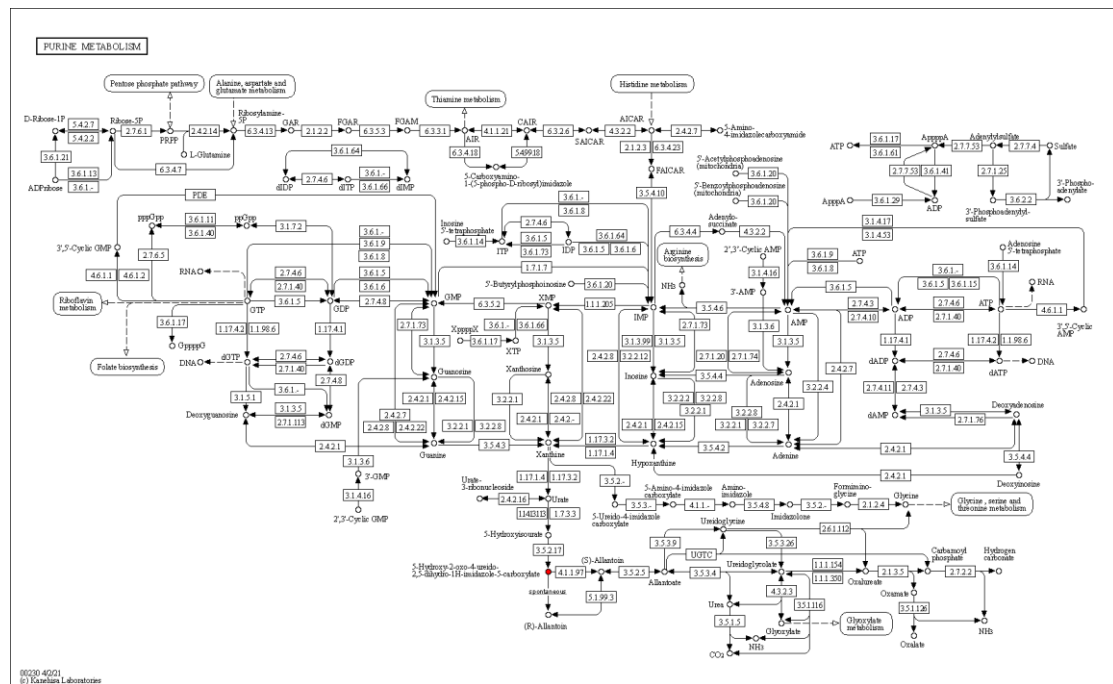

b

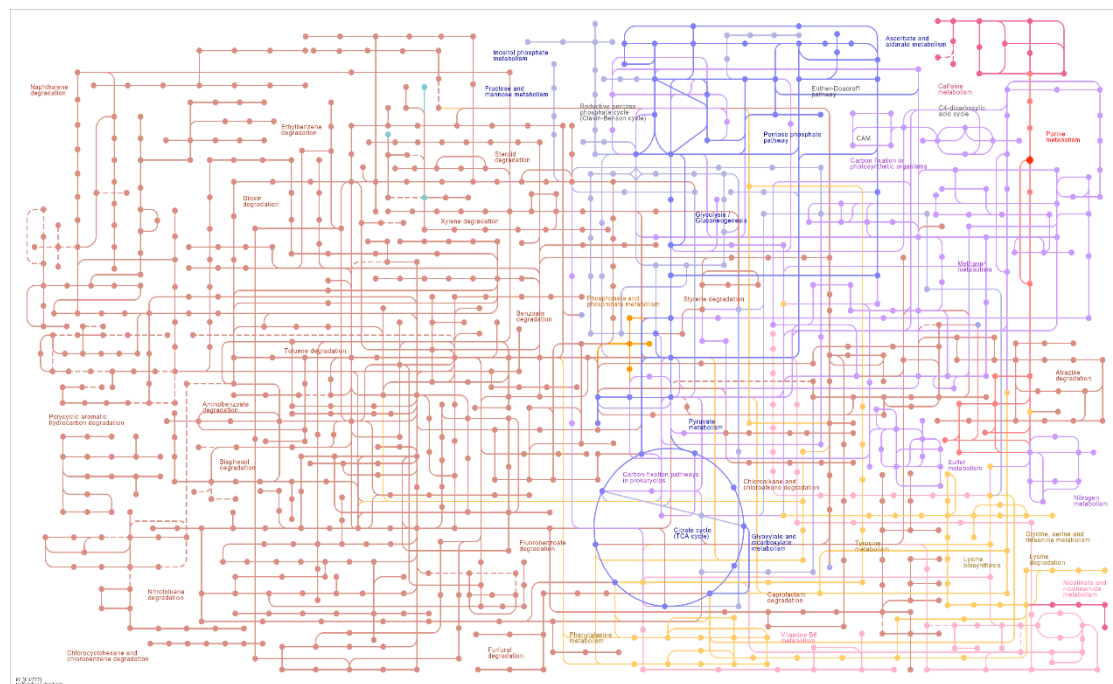

**Fig.S3** 5-hydroxy-2-oxo-4-ureido-2,5-dihydro-1H-imidazole-5-carboxylic acid, occurring in both modes and both cultivars, participates in purine metabolism (a) and microbial metabolism in diverse environment (b). The red points in pathways indicate the compound was upregulated significantly.

a

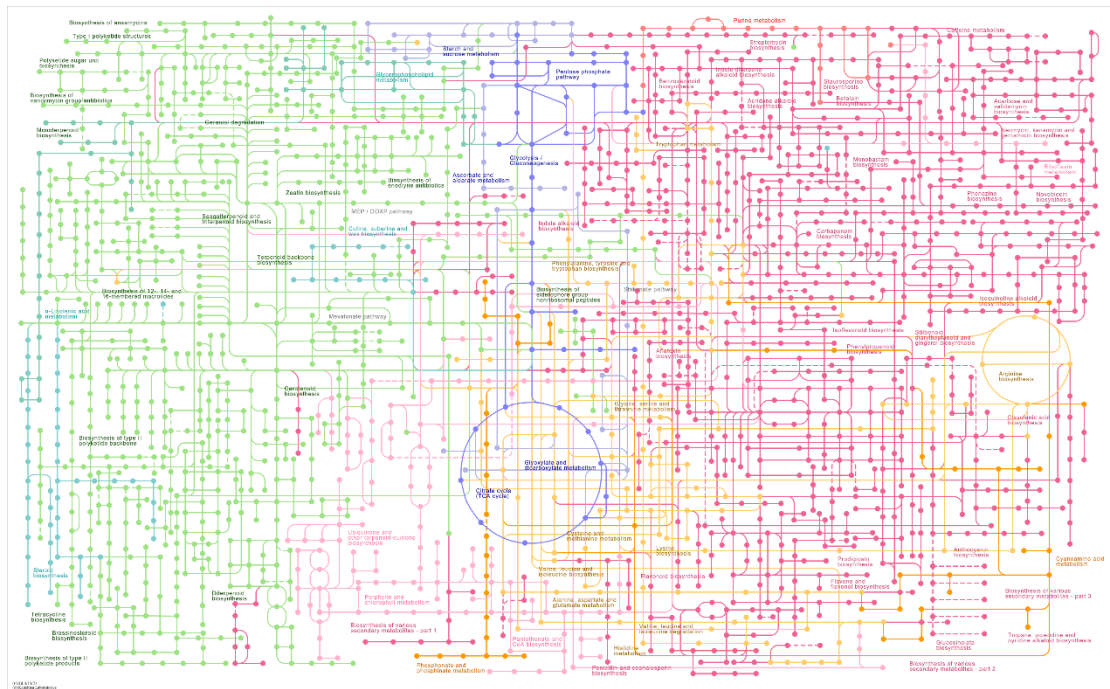

b

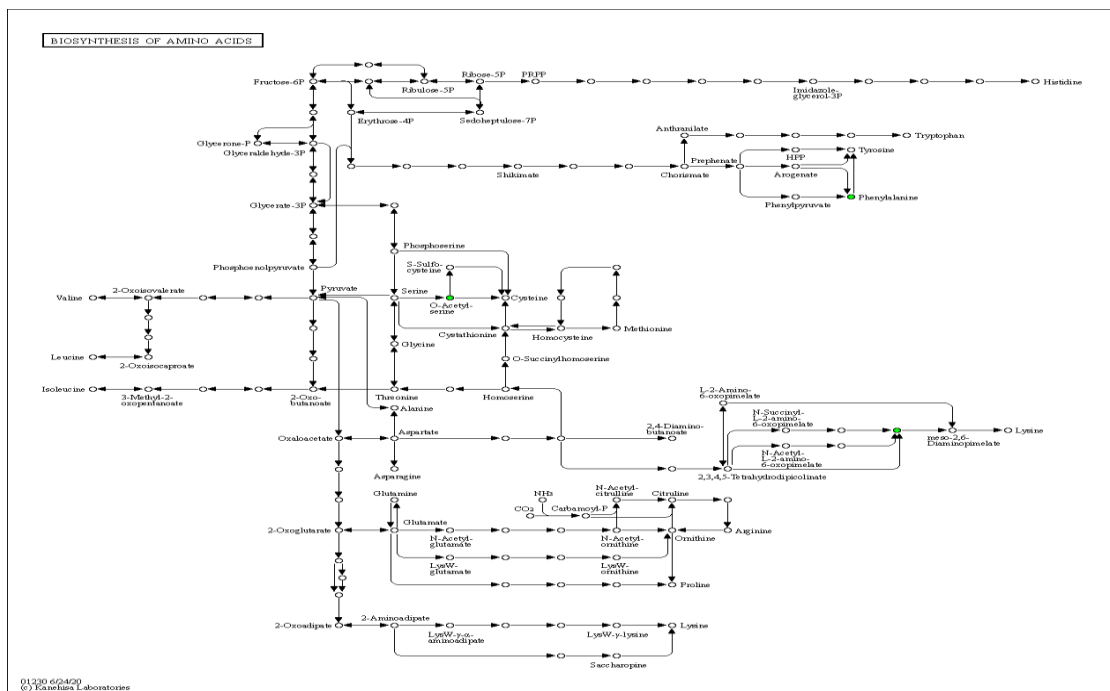

c
